# Supplementary material for: Lateral, Vertical, and Temporal Variability of Seawater Carbonate Chemistry at Hog Reef, Bermuda
Source: Frontiers journal article supplement (doi:10.3389/fmars.2021.562267), 2021-02-11
Supplement: Data_Sheet_1.docx [file Data_Sheet_1.docx]

Supplementary Material

# Supplementary Figures


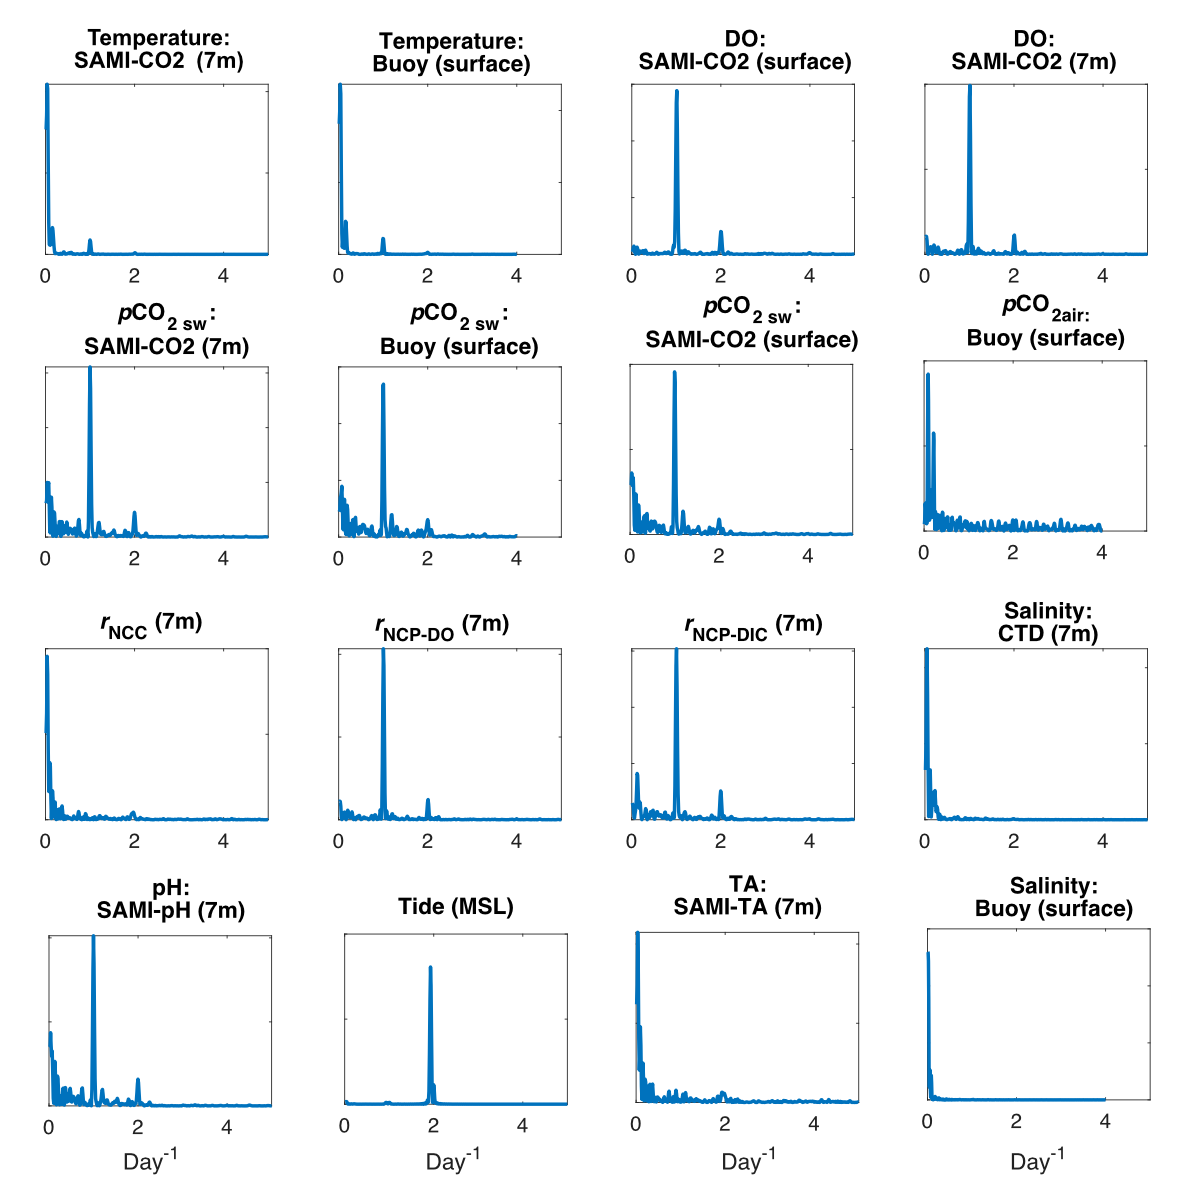


**Supplementary Figure 1.** Lomb-Scargle periodograms of raw (non-filtered) autonomous moored sensor parameters as well as calculated *r*NCC-TA, *r*NCP-DO, and *r*NCP-DIC (mean anomaly).

**Supplementary Figure 2.** Temporal variability of **(A)** pressure at the instrument face, **(B)** current speed, and **(C)** current direction over the deployment period throughout depth from the ADCP.


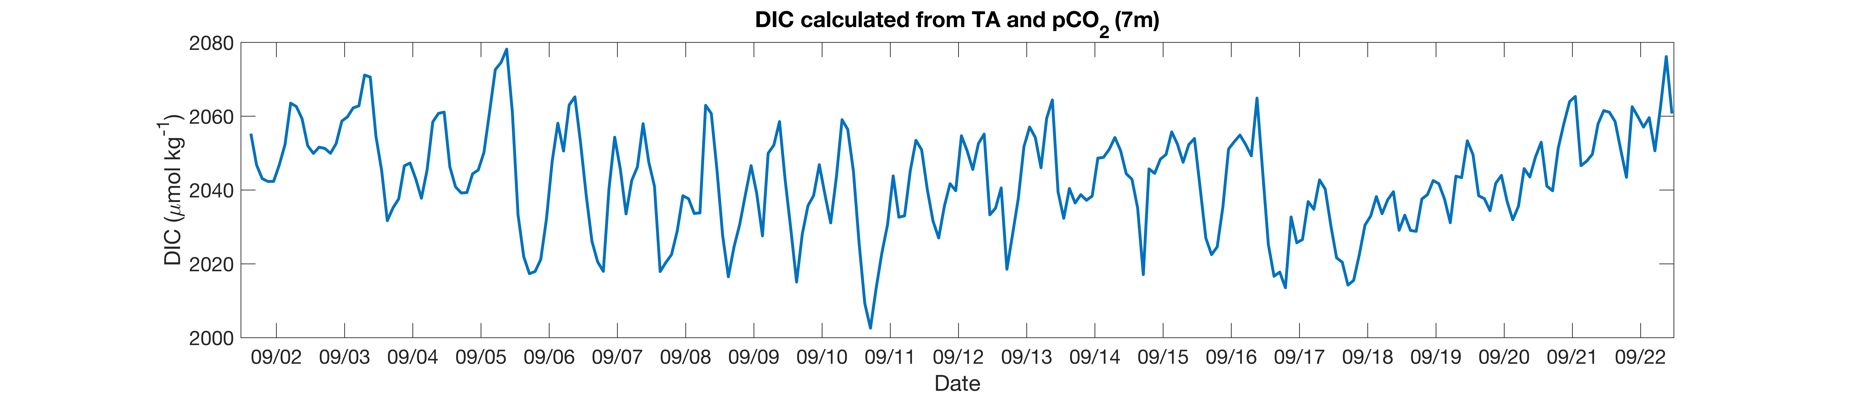


**Supplementary Figure 3.** Dissolved inorganic carbon (DIC) calculated from total alkalinity (TA) from the SAMI-TA and *p*CO2 from the SAMI-CO2 measured at 7m.

**Supplementary Figure 4.** (a) Time series of raw temperature data at 7m (blue) and surface (orange); (b,c) Lomb-Scargle periodograms of raw (non-filtered) temperature at 7m and surface; (d) time series of temperature data with a highpass filter at 7m and surface; and (e,f) Lomb-Scargle periodograms of filtered temperature at 7m and surface.

**Supplementary Figure 5.** (a) Time series of raw total alkalinity (TA) at 7m; (b) Lomb-Scargle periodogram of raw (non-filtered) TA; (c) time series of TA smoothed with a Savitzky-Golay filter; (d) Lomb-Scargle periodogram of smoothed TA; (e) time series of smoothed TA with a high pass filter; and (f) Lomb-Scargle periodogram of smoothed and filtered TA.

**Supplementary Figure 6.** (a) Time series of raw *rNCC-TA* (mean anomaly); (b) Lomb-Scargle periodogram of raw (non-filtered) *rNCC-TA*; (c) time series of *rNCC-TA* smoothed with a Savitzky-Golay filter; (d) Lomb-Scargle periodogram of smoothed *rNCC-TA*; (e) time series of smoothed *rNCC-TA* with a high pass filter; and (f) Lomb-Scargle periodogram of smoothed and filtered *rNCC-TA*.
